# Supplementary material
Source: PubMed Central journal article supplement (PMC2801265)
Supplement: supp_M109.063032_jbc.M109.063032-1.pdf [file supp_M109.063032_jbc.M109.063032-1.pdf]

## **List of Supplementary Files for Frieze et al.**

### **A. Complete List of Supplementary Files (1 file)**

### **B. Supplementary Methods (1 file)**

### **C. Supplementary Figures (all in 1 file)**

**Figure S1.** Validation of the ZNF263 antibody

**Figure S2.** qPCR confirmation of ZNF263 ChIP-seq targets

**Figure S3.** Motif predicted for ZNF263 by the zinc finger code

**Figure S4.** ChIP-PCR analysis of the COL11A2 promoter

**Figure S5.** Secondary motif identified in the ZNF263 binding sites

**Figure S6.** Transfac matrix similar to the secondary ZNF263 motif

**Figure S7.** PWMs of the binding site matches to the experimentally derived and predicted ZNF263 motifs

### **D. Supplementary Tables (7 separate files)**

**Table S1:** Primer sequences

**Table S2:** Top 1473 ZNF263 binding sites used for motif identification

**Table S3:** Top 5273 ZNF263 binding sites

**Table S4:** RNA expression data for ZNF263 targets in K562 cells

**Table S5:** ZNF263\_siRNA\_expression\_arrays

**Table S6:** Gene ontology analysis of ZNF263-regulated genes.

**Table S7:** Matches to the predicted and experimentally derived ZNF263 motifs
