# Supplementary material
Source: PubMed Central journal article supplement (PMC2801265)
Supplement: supp_M109.063032_jbc.M109.063032-4.pdf [file supp_M109.063032_jbc.M109.063032-4.pdf]

### Frietze\_Table S1. Primer sequences

|                    |                        |
|--------------------|------------------------|
| MBD1 promoter F    | CAATAGTGCGCAGGTGCTTA   |
| MBD1 promoter R    | TCCTCTGAAGCGGTAGCTGT   |
| PTPN4 promoter F   | CATGTTCGGTTGCTATGCTG   |
| PTPN4 promoter R   | GCAAGAGGAGCTCAGTCACC   |
| EREG promoter F    | ACAAAGCAAACCAAGCCATC   |
| EREG promoter R    | CCCTGGAGCACCTGAGAGTA   |
| RALA promoter F    | TTCTCCTCCTCCTCCTCCTC   |
| RALA promoter R    | GGAGGGTACTCGGTCCTTGT   |
| COTL1 promoter F   | GGAGCGTCTTGATTCTCTGG   |
| COTL1 promoter R   | GGGAGAGTGAGAGGGAGGAG   |
| TBX1 enhancer F    | GCCAGAAGACTCCACAGACC   |
| TBX1 enhancer R    | AGGGAGGATGTGGAGAGGAT   |
| STX16 promoter F   | CCACTCTAATTCAGCGACCA   |
| STX16 promoter R   | ACTGGGTCCAGGCACTAGG    |
| NDUF7 intron F     | CAAGTTGCGAGTGTGGACTG   |
| NDUF7 intron R     | CCCAGACAGGGAGCACAG     |
| MKNK2 us region F  | CCAGAAGGAGGACAAACAGG   |
| MKNK2 us region R  | AGGGAGAGAAGGACCGAGAG   |
| CST6 ds region F   | AATCAGGCAGTGCCTCACC    |
| CST6 ds region R   | AGGCACTGTCCTAGCCTTCA   |
| ZNF333 F           | CACAGGAGAGAAGCCCTACG   |
| ZNF333 R           | TCGCGCACTCATAACAGTTTC  |
| hPol II F          | AGATGAAACCGTTGTCCAAACT |
| hPol II R          | AGGTTACGGCAGTTTGTCTCTC |
| Col11A2 promoter F | TGAGGTGACTGTATGAGGATGG |
| Col11A2 promoter R | CAAAGCTTGCCTTGTGTCC    |
| RGS10_ChIP_F       | CGAAGCCGCTTACCTGAC     |
| RGS10_ChIP_R       | GCTGCTCCTTCTCCTCCTC    |
| EBI3_ChIP_F        | CCCACCAGTGAGTCAGACCT   |
| EBI3_ChIP_R        | GTCGTGGGAGACTTGAGAGG   |
| KIAA1324_ChIP_F    | GAGGCCAGGAATGTGTGTTT   |
| KIAA1324_ChIP_R    | CCACTCCCTTAGGACTGCTG   |
| GPER_ChIP_F        | AGAAGAGCAGTGCAAGTGTGG  |
| GPER_ChIP_R        | CAGCCTATCTGGTGGTGCTC   |
| FoxA1_F            | AGCGACCACAAAGAGGAAGA   |
| FoxA1_R            | CTCCAGCTCACTCCCTGAAG   |
| ITPKA_ChIP_F       | AGGACGTGGGTGTCAGGTACG  |
| ITPKA_ChIP_R       | CTCCTAAACCGCGAGAACAG   |
